# Supplementary material for: Evaluating a blended course for Japanese learners of English: why Quality Matters
Source: Springer Nature journal article supplement (doi:10.1186/s41239-019-0137-2), 2019-03-14
Supplement: MOESM2 [file 16546208]

**Appendix A**

Student Course Evaluation Questionnaire in Japanese and English

以下の項目にしたがって、CLEコンテンツなどのOUGEOのサイトと内容についてあなたの意見に該当するものをチェックしてください。このアンケートの回答は成績には反映されません。

For each of the items below, please check the answer that reflects your opinion of the OUGEO website and content. Your answers to the questions will not be evaluated and will not affect your grade in any way.

第一部　サイト評価

Part 1 Website Evaluation

| 項目  Items | 全くそう思わない  strongly disagree | そう思わない  disagree | そう思う  agree | 強くそう思う  strongly agree |
| --- | --- | --- | --- | --- |
| **1. サイトの内容は役に立つ。**  **The content of the website is useful.** | 2 | 5 | 50 | 14 |
| **2. サイトの内容は自分の学習ニーズに合致している。**  **The content of the website is relevant to my needs.** | 2 | 9 | 51 | 9 |
| **3. このサイトは使いやすい。**  **The website is easy to use.** | 0 | 14 | 52 | 5 |
| **4. 問題なくこのサイトを使える。**  **The website works well.** | 1 | 21 | 39 | 10 |
| **5. サイトのナビゲーション（学習手順など）が分かりやすい。**  **The website is easy to navigate.** | 0 | 4 | 54 | 13 |
| **6. 指示は従いやすい。**  **The instructions are easy to follow.** | 0 | 0 | 57 | 14 |
| **7. 各週の課題の順番が適切。**  **I like the order of tasks in each week.** | 0 | 5 | 54 | 12 |
| **8. 各週の課題のレイアウトが適切。**  **I like the layout of tasks in each week.** | 0 | 4 | 55 | 12 |
| **9. 課題の難度が適切。**  **The tasks are of appropriate difficulty level.** | 0 | 13 | 47 | 11 |
| **10. 課題のフィードバックは役に立つ。**  **The electronic feedback I get on the tasks is helpful.** | 0 | 1 | 54 | 16 |

4段評価で適切性を判断してください。

Please rate the appropriateness of the following. Indicate your answer on a scale of 1 (not appropriate) to 4 (very appropriate).

| 項目  Items | 1  適切でない  very inappropriate | 2 | 3 | 4  適切である  very appropriate |
| --- | --- | --- | --- | --- |
| 11. Arialフォントの使用  Arial font | 1 | 4 | 36 | 30 |
| 12. 文字のサイズ  Font size | 0 | 0 | 34 | 37 |
| 13. 文字の色  Font colors | 0 | 2 | 30 | 39 |
| 14. 太字  Bolding | 0 | 0 | 32 | 39 |
| 15. イタリック  Italics | 0 | 0 | 35 | 36 |
| 16. 画像  Images | 0 | 2 | 31 | 38 |
| 17. 動画  Videos | 1 | 8 | 30 | 32 |
| 18. 音声  Audios | 1 | 9 | 35 | 26 |
| 19. PDFファイル  PDF files | 1 | 4 | 36 | 30 |
| 20. 全体のレイアウト  Overall layout | 0 | 1 | 35 | 35 |

OUGEO授業のサイトの各種機能の使用頻度について、あてはまるものをチェックしてください。

How often have you used the following functions of the website for this course (OUGEO)?

| 機能  Functions | 一度もない  Never | 一度  Once | ときどき  Regularly | いつも  Always |
| --- | --- | --- | --- | --- |
| 21. 掲示板  Discussion Boards | 30 | 13 | 24 | 4 |
| 22. メール  Email | 13 | 11 | 37 | 10 |
| 23. カレンダー  Calendar | 44 | 5 | 20 | 2 |
| 34. KOAN掲示板  Course Messages | 10 | 2 | 33 | 26 |
| 25. 成績表  My Grades | 2 | 4 | 39 | 26 |
| 26. ヘルプ  Help | 36 | 9 | 24 | 2 |
| 27. その他 (具体的に: __________)  Others (if any, please write the name of the function: __________) |  |  |  |  |

以下の携帯アプリの使用頻度について、あてはまるものをチェックしてください。

How often have you used the following mobile apps?

| アプリ  Apps | 一度もない  Never | 一度  Once | ときどき  Regularly | いつも  Always |
| --- | --- | --- | --- | --- |
| 28. Mobile Learn | 36 | 8 | 21 | 6 |
| 29. Bb Student | 32 | 12 | 22 | 5 |

4段評価で、使った機能の有用性を判断してください

Please rate the helpfulness of the following functions if you have used them. Indicate your answer on a scale of 1 (not useful) to 4 (very useful).

| 機能  Functions | 使ったことはない  never used | 1  役に立たない  not useful | 2 | 3 | 4  非常に役に立つ  very useful |
| --- | --- | --- | --- | --- | --- |
| 30. 掲示板  Discussion Boards | 22 | 2 | 16 | 26 | 5 |
| 31. 最も役に立った掲示板は？  Which discussion board did you find the most useful?     - Technical and General Support（機材操作・ソフトウェア使用等サポート掲示板）28 - Reading（リーディング）19 - Listening（リスニング）10 - Speaking（スピーキング）12 - Writing（ライティング）13 - About each week’s photo and its message（週の始まりの画像とそのキャプション掲示板）13   32. その他 (具体的に): _________________  Others (please specify): _________________ | | | | | |
| 33. メール  Email | 19 | 1 | 13 | 26 | 12 |
| 34. カレンダー  Calendar | 37 | 1 | 16 | 15 | 2 |
| 35. KOAN掲示板  Course Messages | 9 | 0 | 12 | 36 | 14 |
| 36. 成績表  My Grades | 3 | 1 | 8 | 33 | 26 |
| 37. ヘルプ  Help | 26 | 0 | 17 | 19 | 9 |
| 38. その他 (具体的に: __________)  Others (please write the name of the function: __________) |  |  |  |  |  |

4段階評価で以下のアプリの有用性を判断してください。

Please rate the usefulness of the following apps on a scale of 1 (not useful) to 4 (very useful).

| アプリ  Apps | 1  役に立たない  not useful | 2 | 3 | 4  非常に役に立つ  very useful |
| --- | --- | --- | --- | --- |
| 39. Mobile Learn | 11 | 18 | 38 | 4 |
| 40. Bb Student | 11 | 21 | 35 | 4 |

第二部　授業評価

Part 2 Course Evaluation

OUGEOの授業についてあなたの意見に該当するものをチェックして下さい。このアンケートの回答は成績には反映されません。

Please check the answer that most accurately reflects your opinion on the OUGEO course. Your answers to the questions will not be evaluated and will not affect your grade in any way.

| 項目  Items | そう思わない  No | どちらも言えない  To a certain degree | そう思う  Yes |
| --- | --- | --- | --- |
| **41. この授業はあなたの英語学習のニーズを満たした**  **Has the course met your English language needs?** | 1 | 20 | 50 |
| **42. 役に立つ英語力が身についた**  **Do you feel that you have learned useful English skills?** | 3 | 22 | 46 |
| **43. この授業によってあなたの英語力は向上した**  **Do you feel that in general your English has improved because of this course?** | 6 | 15 | 50 |
| **44. 授業のペースは適切**  **Was the pace of the course appropriate for you?** | 1 | 14 | 56 |
| **45. face-to-face授業（教室授業）は役に立つ**  **Did you find the face-to-face classes useful?** | 4 | 20 | 47 |
| **46. 授業の質は優れている。**  **Was the standard of the teaching good?** | 1 | 21 | 49 |
| **47. システムに関するトラブルの支援は十分に受けた**  **Did you receive enough support regarding technical issues?** | 10 | 23 | 38 |

以下の項目の有用性について適切なものを選んでください。可能であればその理由も書いてください。

How useful did you find the following? Please check the appropriate box and explain your reasons wherever possible.

| 項目  Items | 1  役に立たない  not useful | 2 | 3 | 4  非常に役に立つ  very useful |
| --- | --- | --- | --- | --- |
| 48. プレイスメントテスト  Placement test | 3 | 14 | 32 | 22 |
| 49. 事前アンケート  Technology survey | 5 | 18 | 35 | 13 |
| 50. 受講ガイド  Read Me First | 0 | 6 | 26 | 39 |
| 51. リーディングの文章  Reading texts | 1 | 11 | 29 | 30 |
| 52. リーディングの音声  Reading audio files | 3 | 14 | 31 | 23 |
| 53. リーディングの練習問題：  選択肢問題  Reading tasks: Multiple choice questions | 1 | 11 | 29 | 30 |
| 54. リーディングの練習問題：  穴埋め問題  Reading tasks: Fill in the blanks questions | 1 | 11 | 32 | 27 |
| 55. リスニング教材  Listening passages | 2 | 10 | 26 | 33 |
| 56. リスニングの音声  Listening audio files | 2 | 14 | 31 | 24 |
| 57. リスニングの練習問題：  選択肢問題  Listening tasks: Multiple choice questions | 0 | 12 | 31 | 28 |
| 58. リスニングの練習問題：  穴埋め問題  Listening tasks: Fill in the blanks questions | 0 | 9 | 34 | 28 |
| 59. テッドトーク  TED talks | 5 | 20 | 22 | 24 |
| 60. テッドトークの課題  TED talk tasks | 5 | 21 | 29 | 16 |
| 61. スピーキングの課題  Speaking tasks | 4 | 12 | 27 | 28 |
| 62. スピーキングのサンプル  Speaking samples | 5 | 20 | 28 | 18 |
| 63. スピーキング評価項目表  Speaking rubric | 2 | 16 | 28 | 25 |
| 64. スピーキングのフィードバック  Feedback on speaking tasks | 2 | 8 | 24 | 36 |
| 65. ライティングの課題  Writing tasks | 2 | 9 | 30 | 30 |
| 66. ライティング評価項目表  Writing rubric | 3 | 9 | 32 | 27 |
| 67. ライティングのフィードバック  Feedback on writing tasks | 1 | 5 | 30 | 35 |
| 68. リーディングの単語脚注  Vocabulary glosses of the reading texts | 2 | 8 | 31 | 30 |
| 69. リスニングの単語脚注  Vocabulary glosses of the listening passages | 1 | 9 | 29 | 32 |
| 70. リーディングの文法脚注  Grammar notes of the reading texts | 2 | 13 | 28 | 28 |
| 71. リスニングの文法脚注  Grammar notes of the listening passages | 2 | 13 | 29 | 27 |
| 72. 発音練習のビデオ  Pronunciation resources | 3 | 15 | 34 | 19 |
| 73. 自主発展学習  Supplementary resources | 5 | 15 | 37 | 14 |
| 74. 英語学習のヒント（週の始まりの画像とそのキャプション）  English learning tips (the photos and its captions at the beginning of each week) | 0 | 15 | 32 | 23 |
| 75. ポスター発表  Poster presentation | 2 | 13 | 34 | 22 |
| 76. ポスター発表のサンプル  Poster presentation samples | 2 | 7 | 38 | 24 |
| 77. 拡張現実（Blippar）のチュートリアル  Augmented reality (Blippar) tutorial | 5 | 15 | 31 | 20 |
| 78. 拡張現実の経験  Augmented reality experience | 6 | 16 | 30 | 19 |
| 79. “Skills for Success”発展学習  “Skills for Success” resources | 8 | 17 | 34 | 12 |
| 80. オンラインリソース  Recommended online resources | 3 | 15 | 37 | 16 |
| 81. 授業について変更してほしいことやコメントがあれば、ポジティブでもネガティブでも自由に書いてください。  What would you change on the course if you had the chance? Please feel free to write any comments you have about the course, whether they are positive or negative. | | | | |
